# Supplementary material
Source: HighWire-hosted journal article supplement (http://erj.ersjournals.com/highwire/filestream/113943/field_highwire_adjunct_files/0/erj_01813-2012_Bonnet.pdf)
Supplement: erj_01813-2012_Bonnet.pdf [file erj_01813-2012_Bonnet.pdf]

Warning: This form is not supported with the current version of Acrobat or Adobe Reader.  
Upgrade to the latest version for full support.
